# Supplementary material for: Circular economy in hot-dip galvanizing with zinc and iron recovery from spent pickling acids
Source: Royal Society of Chemistry journal article supplement (doi:10.1039/d2ra08195d), 2023-01-01
Supplement: d2ra08195d1.pdf [file d2ra08195d1.pdf]

# Circular Economy in Hot-Dip Galvanizing with Zinc and Iron Recovery from Spent Pickling Acids

Andrea Arguillarena,<sup>a</sup> María Margallo,<sup>a</sup> Axel Arruti-Fernández,<sup>b</sup> Javier  
Pinedo,<sup>b</sup> Pedro Gómez,<sup>b</sup> Inmaculada Ortiz<sup>a</sup>, and Ane Urtiaga,<sup>\*a</sup>

- a. Chemical and Biomolecular Engineering Department, Universidad de Cantabria,  
Avda. De Los Castros, s.n., 39005, Santander, Spain. E-mail: [urtiaga@unican.es](mailto:urtiaga@unican.es)
- b. Apria Systems, Parque Empresarial de Morero, Parcela P.2-12, Nave 1-Puerta 5,  
39611, Guarnizo, Spain.

Corresponding autor: Ane Urtiaga

[urtiaga@unican.es](mailto:urtiaga@unican.es); Tel: +34 942 201587

## **SUPPLEMENTARY INFORMATION**

## Calculation of the mass transfer coefficient

This supplementary information provides further information on data used to calculate the mass transfer coefficient ( $k_m$ ), of zinc species through the porous membranes embedded with the organic phase,

$$k_m = \frac{D_{i,B} \cdot \varepsilon}{\delta \cdot \tau}$$

where  $D_{i,B}$  is the diffusivity of the zinc chloride organic complex  $ZnCl_2 \cdot 2HCl \cdot 4TBP$  in the organic extractant phase ( $m^2/h$ ),  $\varepsilon$  is the porosity of the membrane (-),  $\delta$  is the thickness of the membrane (m), and  $\tau$  is the tortuosity (-).

### Diffusion coefficient ( $D_{i,B}$ )

The diffusivity was calculated using the Wilke-Chang equation,

$$D_{i,B} = \frac{7,4 \cdot 10^{-8} (\phi_B \cdot M_B)^{1/2} \cdot T}{\mu_B \cdot V_i^{0,6}}$$

where  $\phi_B$  is the coefficient of association of the organic phase (-),  $M_B$  is the average molecular weight of the organic phase (g/mol),  $T$  is the temperature (K),  $\mu_B$  is the viscosity of the organic phase (cP), and  $V_i$  is the molar volume of the complex  $ZnCl_2 \cdot 2HCl \cdot 4TBP$  ( $cm^3/mol$ ).

### Membrane tortuosity ( $\tau$ )

The tortuosity of the porous membrane was calculated using the following equation,

$$\tau = \frac{(2 - \varepsilon)^2}{\varepsilon}$$

Next table shows the data used for the  $D_{i,B}$  calculation.

Table SI.1. Data used for mass transfer coefficient ( $D_{i,B}$ ) calculation.

| Property | Value             | Definition                                      |
|----------|-------------------|-------------------------------------------------|
| $\phi_B$ | 1                 | Coefficient of association of the organic phase |
| $M_B$    | 224.96 g/mol      | Average molecular weight of the organic phase.  |
| $T$      | 293 K             | Temperature                                     |
| $\mu_B$  | 3.2 cP            | Viscosity of the organic phase                  |
| $V_i$    | 1206.0 $cm^3/mol$ | Molar volume of $ZnCl_2 \cdot 2HCl \cdot 4TBP$  |

The diffusivity of the zinc complex was  $D_{i,B} = 1.57 \cdot 10^{-10} m^2/s$ , and the tortuosity of the porous membrane

was  $\tau=6.4$ . Thus, the mass transfer coefficient used in this mathematical model was  $k_m= 2.45 \cdot 10^{-7}$  m/s
